# Supplementary material for: Pyroptosis-Related lncRNAs for Predicting the Prognosis and Identifying Immune Microenvironment Infiltration in Breast Cancer Lung Metastasis
Source: Front Cell Dev Biol. 2022 Mar 4;10:821727. doi: 10.3389/fcell.2022.821727 (PMC8931340; doi:10.3389/fcell.2022.821727)
Supplement: Supplementary file 7 [file Table1.xlsx]

## Sheet: PRGs
NAIP
GSDMC
GSDMA
GSDMB
NLRP1
IL18
CASP4
FOXO3
PYCARD
APIP
CASP1
GSDMD
DHX9
GSDME
CASP3
NLRP9
NLRP3
IL1B
NLRC4
AIM2
